# Supplementary material for: Connexin 43 expression predicts poor progression-free survival in patients with non-muscle invasive urothelial bladder cancer
Source: HighWire-hosted journal article supplement (doi:10.1136/jclinpath-2015-202898), 2015-08-06
Supplement: jclinpath-2015-202898supp_abstract_in_Deutsch.pdf [file jclinpath-2015-202898supp_abstract_in_Deutsch.pdf]

## **ABSTRACT (native language German)**

**Ziele:** Evaluation der Proteinexpression von Connexin 43 (Cx43) beim primären Urothelkarzinom der Harnblase bezüglich möglicher Assoziationen mit histopathologischen Eigenschaften als auch mit klinischen Verlauf.

**Methoden:** Erstellung eines Gewebemikroarray (TMA) von 348 Gewebeproben von insgesamt 174 Patienten mit primären Urothelkarzinom der Harnblase. Der TMA wurde immunhistochemisch auf Cx43 untersucht und die Intensität der Färbung semiquantitativ evaluiert (Score 0, 1+, 2+). Die statistische Assoziationen von Cx43 mit klinischen und pathologischen Eigenschaften wurden untersucht. Zur Bestimmung von Prediktoren des progressionsfreien Überlebens (PFS) wurden univariable und multivariable Cox-Regressionsanalysen durchgeführt.

**Resultate:** Cx43 wurde in 118 (67.8%) der insgesamt 174 Urothelkarzinome exprimiert, von welchen 31 Tumore (17.8%) eine starke (score 2+) und mehrheitlich homogene Exprimierung zeigten. Eine starke Exprimierung von Cx43 (score 2+) war mit höherem Tumorgrad, Multifokalität und mit einer gesteigerten Ki-67-Proliferationsfraktion assoziiert (alle  $p < 0.05$ ). In der Subgruppe von pTa und pT1 Blasentumore ( $n = 158$ ), zeigten sich eine starke Cx43 Immunexpression ( $p < 0.001$ ), ein solider Tumorwachstum ( $p < 0.001$ ) und eine gesteigerte Ki-67-Proliferationsfraktion ( $p < 0.05$ ) als signifikante Prediktoren für ein kürzeres PFS in der univariablen Cox-Regressionsanalyse. In der multivariable Cox Regressionsanalyse blieben die starke Cx43 Proteinexpression und der solide Tumorwachstum signifikante Risikofaktoren für ein kürzeres PFS.

**Schlussfolgerung:** Die Cx43 Proteinexpression beim nicht-muskelinvasiven Urothelkarzinom der Harnblase (NMIBC) ist ein häufiges Ereignis, wobei die starke Proteinexpression mit einer schlechten Prognose assoziiert ist. Die routinemässige immunohistochemische Färbung von Cx43 könnte möglicherweise Hochrisiko-NMIBC identifizieren.
